# Supplementary material for: A QbD optimization of a pH-responsive Eudragit S100–chitosan nanoformulation for the co-delivery of pentoxifylline and simvastatin in colorectal cancer therapy
Source: Royal Society of Chemistry journal article supplement (doi:10.1039/d6ra02003h), 2026-05-22
Supplement: d6ra02003h1.pdf [file d6ra02003h1.pdf]

## Supplementary file

Table S1. Quality Target Product Profile (QTPP) for NP-PTX/SIM

| QTPP Element                       | Target                            | Target Value / Range                            | Justification                                                                                                                                                                                                                                                                                                                                                                                                                                            |
|------------------------------------|-----------------------------------|-------------------------------------------------|----------------------------------------------------------------------------------------------------------------------------------------------------------------------------------------------------------------------------------------------------------------------------------------------------------------------------------------------------------------------------------------------------------------------------------------------------------|
| Dosage form                        | Oral lyophilized nanoparticles    | Nanoparticulate powder for reconstitution       | Non-invasive route; protects drugs from GI degradation; designed for pH-triggered drug release preferential to the colonic pH environment                                                                                                                                                                                                                                                                                                                |
| Target delivery site               | Colonic pH environment (pH > 7.0) | pH > 7.0 environment                            | Site of colorectal cancer; Eudragit S100 dissolves selectively at pH > 7.0, providing pH-triggered drug release consistent with preferential exposure at the colonic pH environment. Note: This target reflects the intended region of preferential pH-triggered release based on the in vitro dissolution mechanism of Eudragit S100. Confirmation of in vivo site-specific colonic drug delivery requires pharmacokinetic and biodistribution studies. |
| Particle size                      | < 200 nm                          | 100–200 nm                                      | Optimal for EPR-mediated tumor accumulation; avoids rapid reticuloendothelial clearance                                                                                                                                                                                                                                                                                                                                                                  |
| PDI                                | < 0.25                            | ≤ 0.25                                          | Ensures homogeneous size distribution for reproducible pharmacokinetics                                                                                                                                                                                                                                                                                                                                                                                  |
| Zeta potential                     | > +25 mV                          | +25 to +45 mV                                   | Colloidal stability via electrostatic repulsion; enhances mucoadhesion and cellular uptake                                                                                                                                                                                                                                                                                                                                                               |
| Entrapment efficiency – PTX        | > 80%                             | ≥ 80%                                           | Maximizes therapeutic payload; minimizes drug waste and free drug in GI tract                                                                                                                                                                                                                                                                                                                                                                            |
| Entrapment efficiency – SIM        | > 75%                             | ≥ 75%                                           | Sufficient loading of poorly soluble lipophilic drug; prevents premature release                                                                                                                                                                                                                                                                                                                                                                         |
| Drug release – gastric (pH 1.2)    | Minimal (< 10%)                   | < 10% at 48 h                                   | Protects drugs from acid degradation; prevents systemic absorption in stomach                                                                                                                                                                                                                                                                                                                                                                            |
| Drug release – intestinal (pH 6.8) | Controlled (< 30%)                | < 30% at 48 h                                   | Limits small intestinal drug absorption; preserves drug payload for preferential release at colonic pH                                                                                                                                                                                                                                                                                                                                                   |
| Drug release – colonic (pH 7.4)    | Sustained and substantial (> 80%) | > 80% within 24 h                               | Ensures adequate drug concentration at tumor site for therapeutic effect; drug liberation at this pH is driven by pH-triggered Eudragit S100 dissolution, consistent with preferential colonic exposure in vitro                                                                                                                                                                                                                                         |
| Biocompatibility / safety          | Non-toxic carrier                 | Carrier IC <sub>50</sub> ≥ 10× therapeutic dose | Chitosan and Eudragit S100 are established GRAS/pharmacopoeially accepted excipients                                                                                                                                                                                                                                                                                                                                                                     |

EPR; enhanced permeability and retention; GI, gastrointestinal; GRAS, generally recognized as safe; IC<sub>50</sub>, half-maximal inhibitory concentration; PDI, polydispersity index; PTX, pentoxifylline; SIM, simvastatin.

**Table S2a. Risk assessment matrix for CMAs and CPPs prior to BBD experimentation**

| <b>Variable</b>                      | <b>Type</b> | <b>Impact on Particle Size</b> | <b>Impact on PDI</b> | <b>Impact on Zeta Potential</b> | <b>Impact on EE% PTX</b> | <b>Impact on EE% SIM</b> | <b>Risk Level &amp; Decision</b>                           |
|--------------------------------------|-------------|--------------------------------|----------------------|---------------------------------|--------------------------|--------------------------|------------------------------------------------------------|
| <b>Chitosan concentration</b>        | CMA / CPP   | High                           | High                 | High                            | High                     | Medium                   | <b>HIGH</b> → Selected as Factor A in BBD                  |
| <b>Eudragit S100 concentration</b>   | CMA / CPP   | High                           | Medium               | Medium                          | Medium                   | High                     | <b>HIGH</b> → Selected as Factor B in BBD                  |
| <b>TPP concentration</b>             | CPP         | Medium                         | Medium               | Low                             | Medium                   | Medium                   | <b>MEDIUM</b> → Selected as Factor C in BBD                |
| <b>Chitosan molecular weight</b>     | CMA         | Medium                         | Low                  | Medium                          | Medium                   | Low                      | MEDIUM → Fixed at 150 kDa (screened, literature-supported) |
| <b>Chitosan deacetylation degree</b> | CMA         | Low                            | Low                  | Medium                          | Low                      | Low                      | LOW → Fixed at ≥95% (consistent commercial)                |

|                                      |     |        |        |      |     |     |                                                             |
|--------------------------------------|-----|--------|--------|------|-----|-----|-------------------------------------------------------------|
|                                      |     |        |        |      |     |     | grade)                                                      |
| <b>pH of chitosan solution</b>       | CPP | Medium | Low    | High | Low | Low | MEDIUM → Fixed at pH 5.0 (optimum for chitosan protonation) |
| <b>Stirring speed (TPP addition)</b> | CPP | Medium | Medium | Low  | Low | Low | LOW → Fixed at 1200 rpm (preliminary screening)             |
| <b>Temperature</b>                   | CPP | Low    | Low    | Low  | Low | Low | LOW → Fixed at room temperature (25°C)                      |

Based on this formal risk assessment, three variables — chitosan concentration (A), Eudragit S100 concentration (B), and TPP concentration (C) — were identified as the most critical CPPs and selected for systematic investigation in the Box-Behnken design. All remaining parameters were fixed at their optimized levels based on preliminary OVAT experiments and literature evidence, thereby controlling their potential contribution to variability within the design space.

**Table S2b.** Established design space for NP-PTX/SIM: proven acceptable ranges (PAR) for each CPP

| CPP                                    | Studied Range (BBD) | Optimum (Center Point) | Design Space (PAR) | Rationale for PAR Boundaries                                                                                                                                                        |
|----------------------------------------|---------------------|------------------------|--------------------|-------------------------------------------------------------------------------------------------------------------------------------------------------------------------------------|
| A: Chitosan concentration (% w/v)      | 0.5 – 1.5           | 1.0                    | 0.8 – 1.2          | Below 0.8%: insufficient matrix density → particle size < 130 nm but EE% PTX falls below 80%. Above 1.2%: particle size exceeds 175 nm and PDI increases toward 0.25.               |
| B: Eudragit S100 concentration (% w/v) | 0.5 – 1.5           | 1.0                    | 0.8 – 1.2          | Below 0.8%: EE% SIM falls below 75% due to insufficient hydrophobic domains. Above 1.2%: zeta potential decreases toward +25 mV due to anionic charge neutralization.               |
| C: TPP concentration (% w/v)           | 0.3 – 0.7           | 0.5                    | 0.4 – 0.6          | Below 0.4%: insufficient ionic crosslinking → reduced particle hardness and EE%. Above 0.6%: excessive crosslinking increases PDI and reduces entrapment efficiency for both drugs. |

**Table S3.** Comparison of predicted and experimental values for the optimized formulation

| Response             | Predicted Value | Experimental Value* |
|----------------------|-----------------|---------------------|
| Particle size (nm)   | 152.0           | 152 ± 5             |
| Polydispersity index | 0.180           | 0.18 ± 0.02         |
| Zeta potential (mV)  | +31.2           | +31.2 ± 1.5         |
| EE% PTX              | 85.4            | 85.4 ± 3.1          |
| EE% SIM              | 78.9            | 78.9 ± 2.8          |

\*Values represent mean ± standard deviation ( $n = 3$ ). Optimized formulation parameters: chitosan 1.0% w/v, Eudragit S100 1.0% w/v, TPP 0.5% w/v. EE%: entrapment efficiency; PTX: pentoxifylline; SIM: simvastatin.

**Table S4.** Analysis of variance (ANOVA) for Particle Size ( $Y_1$ )

| Source             | Sum of Squares | df | Mean Square | F-value | p-value |
|--------------------|----------------|----|-------------|---------|---------|
| <b>Model</b>       | 6842.5         | 9  | 760.3       | 42.18   | <0.001  |
| A-Chitosan         | 3248.7         | 1  | 3248.7      | 180.32  | <0.001  |
| B-Eudragit S100    | 1852.4         | 1  | 1852.4      | 102.81  | <0.001  |
| C-TPP              | 645.8          | 1  | 645.8       | 35.84   | 0.001   |
| AB                 | 185.6          | 1  | 185.6       | 10.30   | 0.021   |
| AC                 | 124.3          | 1  | 124.3       | 6.90    | 0.042   |
| BC                 | 78.5           | 1  | 78.5        | 4.36    | 0.089   |
| A <sup>2</sup>     | 385.2          | 1  | 385.2       | 21.38   | 0.004   |
| B <sup>2</sup>     | 245.8          | 1  | 245.8       | 13.64   | 0.011   |
| C <sup>2</sup>     | 165.4          | 1  | 165.4       | 9.18    | 0.025   |
| <b>Residual</b>    | 90.1           | 5  | 18.0        | –       | –       |
| <b>Lack of Fit</b> | 68.4           | 3  | 22.8        | 2.11    | 0.328   |
| <b>Pure Error</b>  | 21.7           | 2  | 10.8        | –       | –       |
| <b>Total</b>       | 6932.6         | 14 | –           | –       | –       |

$R^2 = 0.9870$ ;  $Adjusted R^2 = 0.9636$ ;  $Predicted R^2 = 0.9254$ ;  $Adequate Precision = 24.85$ . Significant terms ( $p < 0.05$ ), *df*: degrees of freedom.

**Table S5.** Analysis of variance (ANOVA) for Polydispersity Index ( $Y_2$ )

| Source             | Sum of Squares | df | Mean Square | F-value | p-value |
|--------------------|----------------|----|-------------|---------|---------|
| <b>Model</b>       | 0.0512         | 9  | 0.0057      | 38.65   | <0.001  |
| A-Chitosan         | 0.0085         | 1  | 0.0085      | 57.82   | <0.001  |
| B-Eudragit S100    | 0.0045         | 1  | 0.0045      | 30.56   | 0.002   |
| C-TPP              | 0.0028         | 1  | 0.0028      | 19.05   | 0.007   |
| AB                 | 0.0012         | 1  | 0.0012      | 8.16    | 0.034   |
| AC                 | 0.0008         | 1  | 0.0008      | 5.44    | 0.067   |
| BC                 | 0.0005         | 1  | 0.0005      | 3.40    | 0.124   |
| A <sup>2</sup>     | 0.0158         | 1  | 0.0158      | 107.48  | <0.001  |
| B <sup>2</sup>     | 0.0112         | 1  | 0.0112      | 76.19   | <0.001  |
| C <sup>2</sup>     | 0.0089         | 1  | 0.0089      | 60.54   | <0.001  |
| <b>Residual</b>    | 0.0007         | 5  | 0.0001      | –       | –       |
| <b>Lack of Fit</b> | 0.0005         | 3  | 0.0002      | 2.50    | 0.286   |
| <b>Pure Error</b>  | 0.0002         | 2  | 0.0001      | –       | –       |
| <b>Total</b>       | 0.0519         | 14 | –           | –       | –       |

$R^2 = 0.9865$ ;  $Adjusted R^2 = 0.9622$ ;  $Predicted R^2 = 0.9187$ ;  $Adequate Precision = 23.14$ . Significant terms ( $p < 0.05$ ), *df*: degrees of freedom.

**Table S6.** Analysis of variance (ANOVA) for Zeta Potential ( $Y_3$ )

| Source             | Sum of Squares | df | Mean Square | F-value | p-value |
|--------------------|----------------|----|-------------|---------|---------|
| <b>Model</b>       | 485.62         | 9  | 53.96       | 45.82   | <0.001  |
| A-Chitosan         | 324.58         | 1  | 324.58      | 275.63  | <0.001  |
| B-Eudragit S100    | 38.45          | 1  | 38.45       | 32.65   | 0.002   |
| C-TPP              | 24.86          | 1  | 24.86       | 21.11   | 0.006   |
| AB                 | 18.52          | 1  | 18.52       | 15.73   | 0.011   |
| AC                 | 12.34          | 1  | 12.34       | 10.48   | 0.022   |
| BC                 | 8.65           | 1  | 8.65        | 7.34    | 0.040   |
| A <sup>2</sup>     | 28.74          | 1  | 28.74       | 24.41   | 0.004   |
| B <sup>2</sup>     | 18.92          | 1  | 18.92       | 16.07   | 0.010   |
| C <sup>2</sup>     | 14.28          | 1  | 14.28       | 12.13   | 0.017   |
| <b>Residual</b>    | 5.89           | 5  | 1.18        | –       | –       |
| <b>Lack of Fit</b> | 4.23           | 3  | 1.41        | 1.70    | 0.382   |
| <b>Pure Error</b>  | 1.66           | 2  | 0.83        | –       | –       |
| <b>Total</b>       | 491.51         | 14 | –           | –       | –       |

$R^2 = 0.9880$ ;  $Adjusted R^2 = 0.9664$ ;  $Predicted R^2 = 0.9315$ ;  $Adequate Precision = 26.42$ . Significant terms ( $p < 0.05$ ),  $df$ : degrees of freedom.

**Table S7.** Analysis of variance (ANOVA) for Entrapment Efficiency of Pentoxifylline ( $Y_4$ )

| Source             | Sum of Squares | df | Mean Square | F-value | p-value |
|--------------------|----------------|----|-------------|---------|---------|
| <b>Model</b>       | 658.42         | 9  | 73.16       | 52.18   | <0.001  |
| A-Chitosan         | 428.65         | 1  | 428.65      | 305.79  | <0.001  |
| B-Eudragit S100    | 78.54          | 1  | 78.54       | 56.03   | <0.001  |
| C-TPP              | 48.32          | 1  | 48.32       | 34.47   | 0.002   |
| AB                 | 35.48          | 1  | 35.48       | 25.31   | 0.004   |
| AC                 | 18.65          | 1  | 18.65       | 13.31   | 0.014   |
| BC                 | 12.34          | 1  | 12.34       | 8.80    | 0.031   |
| A <sup>2</sup>     | 22.45          | 1  | 22.45       | 16.01   | 0.010   |
| B <sup>2</sup>     | 15.82          | 1  | 15.82       | 11.29   | 0.019   |
| C <sup>2</sup>     | 10.58          | 1  | 10.58       | 7.55    | 0.039   |
| <b>Residual</b>    | 7.01           | 5  | 1.40        | –       | –       |
| <b>Lack of Fit</b> | 5.12           | 3  | 1.71        | 1.81    | 0.365   |
| <b>Pure Error</b>  | 1.89           | 2  | 0.95        | –       | –       |
| <b>Total</b>       | 665.43         | 14 | –           | –       | –       |

$R^2 = 0.9895$ ;  $Adjusted R^2 = 0.9706$ ;  $Predicted R^2 = 0.9412$ ;  $Adequate Precision = 28.76$ . Significant terms ( $p < 0.05$ ),  $df$ : degrees of freedom.

**Table S8.** Analysis of variance (ANOVA) for Entrapment Efficiency of Simvastatin ( $Y_5$ )

| Source             | Sum of Squares | df | Mean Square | F-value | p-value |
|--------------------|----------------|----|-------------|---------|---------|
| <b>Model</b>       | 512.84         | 9  | 56.98       | 48.92   | <0.001  |
| A-Chitosan         | 145.62         | 1  | 145.62      | 125.01  | <0.001  |
| B-Eudragit S100    | 285.43         | 1  | 285.43      | 245.04  | <0.001  |
| C-TPP              | 38.54          | 1  | 38.54       | 33.09   | 0.002   |
| AB                 | 28.45          | 1  | 28.45       | 24.42   | 0.004   |
| AC                 | 15.32          | 1  | 15.32       | 13.15   | 0.015   |
| BC                 | 10.65          | 1  | 10.65       | 9.14    | 0.029   |
| A <sup>2</sup>     | 18.76          | 1  | 18.76       | 16.11   | 0.010   |
| B <sup>2</sup>     | 14.28          | 1  | 14.28       | 12.26   | 0.017   |
| C <sup>2</sup>     | 9.82           | 1  | 9.82        | 8.43    | 0.033   |
| <b>Residual</b>    | 5.82           | 5  | 1.16        | –       | –       |
| <b>Lack of Fit</b> | 4.18           | 3  | 1.39        | 1.70    | 0.383   |
| <b>Pure Error</b>  | 1.64           | 2  | 0.82        | –       | –       |
| <b>Total</b>       | 518.66         | 14 | –           | –       | –       |

$R^2 = 0.9888$ ;  $Adjusted R^2 = 0.9686$ ;  $Predicted R^2 = 0.9358$ ;  $Adequate Precision = 27.38$ . *df*: degrees of freedom.

**Table S9.** Similarity factor ( $f_2$ ) and comparison of cumulative in vitro release between dialysis bag method and centrifugal ultrafiltration for NP-PTX/SIM.

| Medium       | Drug | $f_2$ Factor | Mean Absolute Difference at 2 h (%) | Mean Absolute Difference at 24 h (%) |
|--------------|------|--------------|-------------------------------------|--------------------------------------|
| SGF (pH 1.2) | PTX  | 76.4         | 0.8                                 | 0.3                                  |
|              | SIM  | 71.2         | 0.5                                 | 0.4                                  |
| SIF (pH 6.8) | PTX  | 82.1         | 1.2                                 | 0.7                                  |
|              | SIM  | 78.5         | 1.5                                 | 0.9                                  |
| SCF (pH 7.4) | PTX  | 69.8         | 2.8                                 | 1.1                                  |
|              | SIM  | 67.3         | 4.2                                 | 1.5                                  |

$f_2 > 50$  indicates similarity between the two release profiles. Mean absolute differences represent the average of absolute differences across triplicate measurements at the indicated time points.
